1 **On simulating cold stunned turtle strandings on Cape Cod**

2

3 **Liu Xiaojian<sup>1¶</sup>, James Manning<sup>2¶\*</sup>, Robert Prescott<sup>3</sup>, Zou Huimin<sup>4</sup>, Mark**  
4 **Faherty<sup>3</sup>**

5

6 <sup>1</sup> School of Remote Sensing and Information Engineering,

7 Wuhan University , Wuhan, China

8 <sup>2</sup> National Oceanic Atmospheric Administrations's Northeast Fisheries Science

9 Center, Woods Hole, Massachusetts, United States of America

10 <sup>3</sup> Massachusetts Audubon's Wellfleet Bay Wildlife Sanctuary, Wellfleet,

11 Massachusetts 02663 United States of America

12 <sup>4</sup> Shandong Agricultural University, Taian, China

13 \*Corresponding author E-mail: [james.manning@noaa.gov](mailto:james.manning@noaa.gov)

14 <sup>¶</sup> LX and JM are Joint Senior Authors

15

16

## 17 **Abstract**

18 Kemp's ridley turtles were on the verge of extinction in the 1960s. While they have  
19 slowly recovered, they are still endangered. In the last few years, the number of  
20 strandings on Cape Cod Massachusetts beaches has increased by nearly an order of  
21 magnitude relative to preceding decades. This study uses a combination of ocean  
22 observations and a well-respected ocean model to investigate the causes and  
23 transport of cold-stunned animals in Cape Cod Bay. After validating the model  
24 using satellite-tracked drifters and local temperature moorings, ocean currents were  
25 examined in the Cape Cod Bay in an attempt to explain stranding locations as  
26 observed by volunteers and, for some years, backtracking was conducted to examine  
27 the potential source regions. The general finding, as expected, is that sub 10.5°C  
28 water temperatures in combination with persistent strong wind stress (>0.4Pa) will  
29 result in increased strandings along particular sections of the coast dependent on the  
30 wind direction. However, it is still uncertain where in the water column the majority  
31 of cold stunned turtles reside and, if many of them are on the surface, considerable  
32 more work will need to be done to incorporate the direct effects of wind and waves  
33 on the advective processes.

34 **Key words:** Kemp's ridley turtles; FVCOM model; ocean current; particle tracking

## 35 **Introduction**

36 Kemp's ridley is the smallest and the most endangered sea turtle in the world and  
37 shows little sign of recovery [1,2,3]. Their perilous situation is attributed primarily to  
38 the over-harvesting of their eggs during the last century. In 1970, it was listed by the

39 U.S. Fish and Wildlife Service [4] as “endangered throughout its range” and it has  
40 received Federal protection under the U.S. Endangered Species Act of 1973 ever since  
41 [2].

42 The adult Kemp's ridley turtles are mainly active in coastal waters less than 165  
43 feet deep primarily in the Gulf of Mexico where satellite telemetry is used to  
44 understand their migratory patterns and habitat for the past few decades [5,6,7,8,9].  
45 The smaller juvenile Kemp's ridley are found in shallow waters, often foraging in less  
46 than 3 feet of water [10]. Juveniles are also found in the Gulf of Mexico [11,12] as  
47 well as along the eastern seaboard of the United States as far north as Nova Scotia,  
48 Canada [13] leaving warm seas to feed on crabs and other prey[14].

49 Sea turtles on the East Coast of the US swim to warmer waters to spend the  
50 winter. Hart et al [15] discuss the seasonal variability of both Loggerhead and  
51 Kemp's ridley strandings based on drifter bottles and particle tracking. As in the  
52 loggerhead study by Santos et al [16], the objective is often to document the location  
53 and probable cause of mortality [17] using a variety of methods such as deployment  
54 of coded oranges [18]. In many cases, it is abrupt changes in temperature that trigger  
55 mortality. Turtles in the vicinity of Virginia, tend to migrate south in late fall each  
56 year [19,20] and, even in Florida, significant mortalities have been reported [21] as a  
57 result of being caught in some cold water bodies/estuaries.

58 In laboratory experiments, Schwartz [22] demonstrated that Kemp's ridleys  
59 become inactive at temperatures below 10°C, although they are somewhat more  
60 resistant than other species. If a sea turtle becomes cold stunned there is little chance  
61 of survival without assistance. Morreale, et al. [23] studied cold stunned stranding  
62 events in the late 1980s on Long Island, NY. Burke et al [24] specifically addressed  
63 the causes of these events and found one year, in particular, when fewer strandings

64 occurred. They attributed this inter-annual variability to slight changes in the  
65 prevalent wind direction at the critical time of year when the water temperature fell  
66 below 10°C.

67 When Kemp's ridley's inside Cape Cod Bay in Massachusetts are late in heading  
68 south and the water temperature gets below 10.4°, they become "cold stunned" [25].  
69 They are apparently trapped due to the presence of the Cape Cod landmass. These  
70 turtles, typically 2 to 3 years old, are sized at 26.9 mean straight carapace length [25]  
71 between a dinner plate and a serving platter [26]. They are so small satellite telemetry  
72 devices can not be easily used to track the turtles like that larger individuals in Gulf of  
73 Mexico [11,12,27]. In recent years, a larger number have been stranding on the shores  
74 of Cape Cod. During the summer months there are a few strandings reported because  
75 of turtles getting a) entangled in fishing gear, b) hit by a boat, and c) stuck in sandbars  
76 on a falling tide but these are less important later in the year when the majority of the  
77 turtles strand due to the cooler temperatures. These turtles are extremely weak, often  
78 wash ashore, and need to be rescued by dozens of trained volunteers each fall. Since  
79 1979, Wellfleet Bay Wildlife Sanctuary staff and volunteers have patrolled the  
80 beaches of Cape Cod, on the lookout for cold-stunned turtles, which are rapidly  
81 transported to the New England Aquarium for evaluation and rehabilitation. In the last  
82 few years, the number of strandings has increased by nearly an order of magnitude  
83 relative to the strandings in the preceding decades.

84 This paper explores the transport of cold stunned Kemp's ridleys using the Finite  
85 Volume Community Ocean Model (FVCOM), a numerical ocean model well-suited  
86 to simulating coastal ocean processes [28]. After validating FVCOM by using drifter  
87 data and mooring data (see supplementary material), we look at the number of sea  
88 turtles stranded in various towns along the shore of Cape Cod Bay from 2012 to 2015

89 and try to explain these distributions based on FVCOM-derived simulated flow fields,  
90 particle tracks, wind records, and observations of water temperature.

## 91 **Methods**

### 92 **FVCOM model**

93 FVCOM is a prognostic, unstructured-grid, Finite-Volume, free-surface, three-  
94 dimensional (3-D) primitive equations Community Ocean Model developed originally  
95 by Chen et al [1,28]. As validated in the supplementary material, the ability of  
96 FVCOM to accurately solve scalar conservation equations in addition to the  
97 topological flexibility provided by unstructured meshes and the simplicity of the  
98 coding structure has made FVCOM ideally suited for many coastal and  
99 interdisciplinary scientific applications [29].

100 FVCOM model has been run on several grids spanning the Northeast Continental  
101 Shelf of the US and is still evolving. The third generation grid (GOM3) was used in  
102 this experiment covering Gulf of Maine and Georges Bank waters and hourly flow  
103 fields are available from 1978 to 2015. The GOM3 grid was developed primarily for  
104 the prediction of coastal ocean dynamics, with horizontal grid resolution ranging from  
105 20 meters to 15 kilometers and includes tides. The vertical domain was divided into  
106 45 s-coordinate levels. We also experimented on finer-resolution “MassBay” grid that  
107 had hourly flow fields available from 2011-2014.

### 108 **Drifter observations**

109 The surface drifters used in this study track the top meter of the water column  
110 [30]. This type is typically referred to as the “Davis-style” or “CODE” drifter first

111 developed for the Coastal Ocean Dynamics Experiment in the early 1980s (Fig 1)  
112 [31]. Our version of this drifter typically has a metal-frame and four fabric sails  
113 measuring 91 cm long and 48 cm wide. These student-built units were deployed  
114 primarily by local fishermen in the vicinity of Cape Cod from 1978 to 2010 with  
115 tracks archived for public access. More than a thousand of these drifters have been  
116 deployed off the New England coast in the past few decades [32,33]. The primary  
117 purpose of these drifters is to validate ocean models (see supplementary material).

118 **Fig 1. Schematic of standard surface drifter from Poulain [30] (left) and photo of**  
119 **surface drifter used in this report being recovered after stranding in Barnstable**  
120 **MA (right).**

## 121 **Moored temperature observations**

122 There are at least three different sets of moored ocean temperature observations  
123 available in the Northeast US. The Northeastern Regional Association of Coastal  
124 Ocean Observing System (NERACOOS) typically has several mooring sites in the  
125 Gulf of Maine [34]. In 2017, they added a mooring (CDIP) inside Cape Cod Bay. The  
126 NERACOOS Mooring A location is shown in Fig 2. The Environmental Monitors on  
127 Lobster Trap Project (eMOLT) [35] comprises another collection of moorings with  
128 18+ years of hourly bottom temperatures from dozens of locations off the New  
129 England coast including several within Cape Cod Bay. Finally, the Mass Division of  
130 Marine Fisheries (DMF) maintains several diver-serviced bottom temperature time  
131 series at a set of shipwrecks off the Massachusetts coast.

132 **Fig 2. Locations of moored observations used in this report including two**  
133 **NERACOOS moorings (blue triangles), five eMOLT moorings (red circles)**  
134 **and four Massachusetts Division of Marine of Fisheries moorings (green**

135 **squares). Also posted are the positions where wind and surface temperature**  
136 **was extracted from the models.**

### 137 **Simulating forward and backward turtle trajectories**

138 The science of tracking particles through the coastal ocean is still evolving [29]  
139 and there are a variety of techniques [25,33,34] that can be applied depending on the  
140 physical and biological behavior of the particle/animal under investigation. In this  
141 case, since the animal's position in the water column and its ability to regulate that  
142 depth is unknown, we present here a very simple case of moving it through the  
143 model's surface fields using the nearest grid nodes with hourly time steps with no  
144 consideration of other factors such as wind and waves. The comparison of observed  
145 and modeled particle tracks is presented in supplementary material Appendix I.

146 For the case of backtracking the cold stunned turtles to estimate their origin, we  
147 first need to get the simulated turtle off the beach in order to begin moving it  
148 backward through the water. The process of selecting a "short distance off the beach"  
149 is not easy. We experimented with multiple methods (simple to complex) to solve this  
150 problem (see supplementary materials). For the purpose of this study, we chose the  
151 simplest method which involves a) finding the nearest point on the model-based  
152 coastline to the stranding location, b) calculating the line from the specified stranding  
153 to that point, and c) then extending the line  $X$  km out to sea. After experimenting with  
154 several values, we chose to set " $X = 1.5$  km". As suggested in Nero et al [27], the  
155 value selected is partly a function of the bathymetric slope offshore where for their  
156 case " $X$ " varied from 0.3km to 1.0km. The backtracking is terminated when the  
157 estimated water temperature exceeds the cold-stunned level. For reasons discussed

158 below, we chose this to be  $10.5^{\circ}\text{C}$ . We backtracked turtles for 2012 and 2013<sup>1</sup>. We  
159 selected the 167 turtle strandings in these years whose simulated trajectory stayed off  
160 the beach. In other words, we focus on only those 167 cases where the backtracking  
161 generated origins within the bay.

## 162 **Binned averaged current and wind**

163 In order to examine the surface current conditions in the bay for a specified  
164 period of time, we bin-averaged both observed and modeled flow fields in  $0.05^{\circ}$   
165 bins. The “observed current” is derived from averaging the first differences of the  
166 near-hourly drifter fixes within each bin. The model data is the hourly output of the  
167 FVCOM model as described in section 2.1 above. We averaged the observed  
168 current, modeled current, and the model wind stress. The “modeled current” in each  
169 grid cell is the average velocities of all nodes within each bin whenever drifters were  
170 present in the bin. While technically different types of current velocity (Lagrangian  
171 vs Eulerian), we assume they are the same. After removing the tidal effects by  
172 sequentially averaging over the solar (24 hour) and lunar (24.841) periods, we  
173 calculated the average surface current of each bin. The wind stress was derived from  
174 the same weather model that drives the FVCOM ocean model which is local  
175 implementation of the NCAR Mesoscale Model (MM5).

## 176 **Turtle stranding data**

177 The Kemp's ridley turtle data used in this experiment was provided by  
178 Massachusetts Audubon's Wellfleet Bay Wildlife Sanctuary. These data include  
179 information on date and location of stranding for each cold-stunned Kemp's ridley sea  
180 turtle from 1991 to 2015. Hundreds of trained volunteers have been participating in

<sup>11</sup> Note: Since there were evidently issues with 2014 model hindcast, we chose to focus only on the previous two years in this analysis.



181 this project since 1979. Beach walkers cover the coastline each fall to document  
182 strandings and report their findings. In order to quantify the relationship between  
183 wind stress and the number of strandings, we calculated the correlation between wind  
184 stress and the number of strandings when the temperature was below 10.5°C. As  
185 noted above, it is not only the strength of the wind that may be important but the  
186 persistence of the wind over time. For this reason, we chose to calculate the “3-day  
187 sum of the windstress components” .

188

## 189 **Sea-surface temperature observations**

190 In addition to the modeled sea-surface temperature (SST) estimates available  
191 hourly, we also have observations of SST from satellite. While clear images are only  
192 available a few times per month in this region, they provide another snapshot  
193 realization of the conditions in Cape Cod Bay. For the purpose of this report, we  
194 accessed the raw data prepared by the University of Delaware and posted via the  
195 MARACOOS.org website.

## 196 **Results**

### 197 **Kemp's ridley strandings on Cape Cod**

198 Fig 3 shows the number of Kemp's ridleys stranded on the shores of Cape Cod  
199 Bay from 1991 to 2015 (with some years 1994-1998 not available due to lack of staff  
200 during those times). As shown, the number of strandings vary from year to year but  
201 have increased dramatically in recent years.

202 **Fig 3. 1991-2015 Cape Cod Bay turtle strandings.**

203 Turtles were recovered in several towns each year between 2012 and 2015 (Figs  
204 4 and 5). The towns with the largest numbers of strandings between 2012-2015 were  
205 located on the mid to outer Cape. Among them, each town reported strandings in  
206 more than one year of the study period, and strandings were reported every year in  
207 Wellfleet and Brewster. While most stranding events occur on the Outer Cape, some  
208 occur Mid Cape. Our hypothesis is that year-to-year changes of stranding locations  
209 are primarily due to small changes in the surface current.

210 **Fig 4. Total turtle strandings per town from 2012-2015. Most of the “Outer**  
211 **Cape” towns (green dots) had >400 strandings while some of the “Mid Cape”**  
212 **towns (purple) had ~200.**

213 **Fig 5. Chart of the number of strandings by town between 2012 - 2015 showing**  
214 **most in the first three Outer Cape towns.**

216

## 217 **Examining binned current and wind**

218 Despite recent efforts to survey the bay from both ships and planes, we do not  
219 know the exact location of the cold stunned turtles in the bay or in the water column.  
220 However, considering that the cold-stunned turtles are not capable of swimming, we  
221 assume they generally follow the surface currents with some effects by the wind and  
222 waves. It is expected that more skillful predictions of stranding positions may be  
223 made using observed ocean surface currents and wind stress to numerically advect  
224 water parcels forward. Fig 6 shows the number of turtles stranded on the shores of  
225 Cape Cod Bay per day in late 2014 with most occurring the week of November 21st.  
226 Fig 7 maps the mean current and the mean wind stress from November 18 – 23, 2014,  
227 and the distribution of the stranded sea turtles for these six days.

228 **Fig 6. The number of turtles stranded on Cape Cod Bay beaches in Nov-Dec**  
229 **2014.**

230 **Fig 7. November 18-23, 2014 mean wind (black arrows) with November 3,**  
231 **2014 sea surface temperature (a), Mass Bay grid simulation of mean ocean**  
232 **surface currents (black arrows) during that time overlaid on surface current**  
233 **variance ellipses (pink) (b), and distribution of turtle strandings by town**  
234 **with November 19, 2014 sea surface temperature (c) , and mean wind for the**  
235 **entire month of November 2014 with December 26, 2014 sea surface**  
236 **temperature (d). The legends are posted on the land mast on the western side**  
237 **of the charts. The largest red dot in panel c denotes 260 turtles stranded in**  
238 **Eastham during the period 18-23 November 2014.**

239 From November 18, 2014 to November 23, 2014, as depicted on the turtle  
240 stranding map (Fig 7c), Truro, Wellfleet, and Eastham had the most strandings (253,  
241 225, and 260, respectively), and their positions are consistent with the oceanic  
242 currents and winds shown by the simulated current and wind maps (Fig 7a and 7b),  
243 distributed in the area where currents and wind stress are most intense, and in their  
244 direction. It can be seen that the combination of ocean current and wind calculated by  
245 FVCOM model can be used to explain the general distribution of strandings.  
246 Comparing the mean wind for one week in mid-November 2014 (Fig 7a) to the mean  
247 wind for the entire month of November 2014 (Fig 7d), we see the intensity of the mid-  
248 November period explains the unusually high rate of strandings on the Outer Cape.  
249 The intensity of these events is best described in the form of time series plots below.  
250 In the future turtle rescue work, FVCOM 3 day forecast model can be used to  
251 simulate stranding events and help volunteer beach walkers focus their efforts.

252       As previous studies have found, when the water temperature of the Cape Cod  
253 Bay is less than 50F (10°C), the metabolism of Kemp's ridley turtle will slow to the  
254 point where they are unable to move and are at the mercy of the wind, waves, and  
255 currents [25]. As shown in Fig 2, we set up 10 temperature detection points and 10  
256 wind stress monitoring points across Cape Cod Bay and Mass Bay to extract the  
257 temperature and wind stress simulated by the model. In the following plots (Figs 8-  
258 10), we examine the relationship between wind stress and strandings especially when  
259 the ocean temperature is below 10.5 °C.  
260

261

262 **Fig 8. 2012:** Top panel shows wind stress (Pa) direction shown in green vectors  
263 (north up) and magnitude in purple. Bottom panel shows Mid-Cape strandings  
264 (blue bars) the Outer-Cape strandings (red bars), modeled surface temperature  
265 (green line), and observed bottom temperature (blueline) in 2012.

266 **Fig 9. 2013:** Top panel: Wind stress with direction shown in green vectors (north  
267 up) and magnitude in purple. Bottom panel: Mid-Cape (blue bars) and Outer-  
268 Cape (red bars) strandings, modeled surface temperature (green line), and  
269 observed bottom temperature (blueline) in 2013.

270 **Fig 10. 2014:** Top panel: Wind stress with direction shown in green vectors  
271 (north up) and magnitude in purple. Bottom panel: Mid-Cape strandings (blue  
272 bars), Outer-Cape strandings (red bars), modeled surface temperature (green  
273 line), and observed bottom temperature (blueline) in 2014.

274 Figs 8-10 show the relationship between the wind stress (top panels), and the  
275 number of strandings in “Outer Cape” and “Mid-Cape” (bottom panels) towns in  
276 2012, 2013, and 2014, respectively. The average of the surface temperature simulated  
277 by all the FVCOM model points (specific model sites shown in Fig 2) and the average  
278 of the bottom temperature observed in Cape Cod Bay (specific observation sites  
279 shown in Fig 2) are also plotted in the bottom panels. The wind stress vector is the  
280 average simulated by FVCOM model points (sites shown in Fig 2). When the  
281 temperature is less than 10.5 °C and the wind stress from a particular direction is  
282 greater than ~0.4 Pa, the strandings generally increase but both conditions must be  
283 met. In the case of 2012 (Fig 8), for example, the strong wind in early November  
284 resulted in near-zero strandings since the water temperature was still above 11°C. In

285 the case of 2013 (Fig 9), there was a pair of events with strong northwesterly wind at  
286 the end of November that coincided with a drop in temperatures resulting in peaks in  
287 strandings around 26 November and 1 December. Note the strong winds ( $>0.4\text{Pa}$ ) in  
288 mid-December 2013 resulted in very few strandings presumably due to the turtles  
289 having fled or already stranded by that time. In the case of 2014 (Fig 10), the wind in  
290 mid-to-late November was not strong but it was persistently from the west over many  
291 days with a drop in both surface and bottom temperature of a few degrees which  
292 evidently resulted in historically high amounts of strandings.

293 Fig 11 (left hand panels) shows the correlation between the number of turtle  
294 strandings in “Outer Cape” towns and the 3-day sum of the **eastward** wind stress in  
295 2012, 2013, 2014 and mean respectively. Fig 11 (right hand panels) show the  
296 correlation between the number of turtles strandings in “Mid Cape” towns and the  
297 **southward** wind stress in 2012, 2013, 2014, and mean respectively. In most cases, the  
298 correlation is greater than 90% and exceeds 95% in several cases. Wind stress and the  
299 number of strandings per three days show a linear correlation.

300 **Fig 11. Linear correlations between eastward (left) and southward (right)**  
301 **components of the wind stress and number of strandings (summed over 3 days)**  
302 **in 2012 , 2013 ,2014 and mean (2012-2014) for Outer Cape (left) and Mid Cape**  
303 **(right) towns.**

304 Finally, in order to estimate the source of turtles (ie their distribution/origin at  
305 the time of first being cold stunned), we look at the backtracking results (Fig 12). We  
306 can also look at the estimate of temperature along their track (Fig 13). In these time  
307 series we see that a) many of the stranded turtles were exposed to  $<10.5^{\circ}\text{C}$  water in  
308 mid-to-late November and b) there were more December stranding events in 2012.

309 **Fig 12. The backtracked positions of the turtles in 2012 and 2013. Red dots**  
310 **show landing locations in November and December. Blue and green dots**  
311 **show estimated locations of back-tracked turtles that stranded in November**  
312 **and December, respectively, when they first encountered  $<10.5^{\circ}\text{C}$ . water.**  
313 **This assumes passive (non-swimming) turtles were only transported by the**  
314 **current when the modeled surface temperature is less than  $10.5^{\circ}\text{C}$ . The blue**  
315 **line is one example of backtracking a turtle that landed just south of Boston**  
316 **Harbor in December. According to the model, that turtle was first cold-**  
317 **stunned off Gloucester, MA.**

318 We might ask where were the turtles that stranded in November located when  
319 they were first exposed to  $<10.5^{\circ}\text{C}$  surface waters? Our results show that turtles  
320 stranded in November 2012 and 2013 may be cold stunned at a variety of locations  
321 (blue dots in Fig 12) primarily in Cape Cod Bay but some in Massachusetts Bay.  
322 Turtles stranded in December 2012 and 2013 (green dots in Fig 12) may originate  
323 even further away, some as far as northern Massachusetts Bay. After first being  
324 exposed to  $<10.5^{\circ}\text{C}$  surface waters, the turtles are evidently in temperatures that vary  
325 considerably but gradually decrease by a few degrees at most before stranding (Fig  
326 13).

327 **Fig 13. Modelled temperature of backtracked surface particles in 2012 (top**  
328 **panel) and 2013 (bottom panel).**

## 329 **Discussion**

330 Although the state-of-the-art coastal ocean models like FVCOM can help  
331 simulate cold stunned turtle pathways, there are a variety of issues to consider: First,

332 uncertainty in the numerically simulated drifter tracks result in differences of up to  
333 several kilometers per day relative to the observed satellite-tracked drifter tracks.  
334 Obviously, there is significant uncertainty in the backtracking results shown in Fig 12.  
335 The 200-meter-per-kilometer difference in modeled vs observed trajectory (as shown  
336 in the supplementary materials) grows over long distances and time so that the  
337 numerical circulation models and particle tracking routines will need to be improved  
338 considerably before these particle tracking tools can be used confidently and  
339 operationally. Simulated trajectories will also differ from actual trajectories due wind  
340 and waves influencing cold stun turtle trajectories. There is a growing body of  
341 literature on surface wave effects on the transport of surface particles. Much of this  
342 research comes from the coast guard search and rescue operations [36, 37] as well as  
343 recent studies on oil spill dispersion. Methods have been devised to add the effects of  
344 multiples forces including direct wind effect, breaking waves [38], Stokes drift [39],  
345 inertial effects [40], and these will need to be considered in future work. Since it is  
346 still uncertain where in the water column these cold stunned turtles reside, we chose  
347 to focus on surface current fields as a first approximation in the study but these results  
348 would change significantly for turtles floating directly on the surface.

349 Additional uncertainties are introduced with the tracking methodology near the  
350 boundary of the model grid (i.e. in shallow waters near the shoreline). We need to  
351 further explore algorithms for forward and backward particle tracking near the coast  
352 especially in this study area where there is a large expanse of wetting and drying tidal  
353 flats and close to 30cm tidal range. Improving our particle tracking models with both  
354 the effects of wind and waves and processes near the coast is the primary goal in the  
355 near future.



356 Despite these limitations, models like FVCOM are improving every year  
357 particularly with increasing grid resolution, incorporation of more realistic  
358 bathymetry, and more observations to assimilate. In order to examine the effect of  
359 different grid resolution, for example, we conducted a sensitivity study comparing  
360 particle tracks on the “GOM3” vs “MassBay” grid (Fig 14). It can be seen here that  
361 the particles released on the GOM3 grid stranded on the Cape Cod beaches faster than  
362 those released on the MassBay. While the final stranding locations would likely be  
363 similar, the particles on the latter grid were not yet stranded at the end of the week-  
364 long simulation.

365 **Fig 14. Comparing particle tracks on the GOM3 (left) and MassBay (right) grid**  
366 **during the week of 18-25 Nov 2014.**

367 Still more observations are needed to monitor in-situ conditions throughout Cape  
368 Cod Bay including more realizations of the deeper currents not depicted by the  
369 standard surface drifters used here. There is uncertainty in both the deeper currents  
370 and the depth at which the turtles generally reside during this critical time in the fall.  
371 When we eventually know where these turtles originate and at what depth of the water  
372 column, divers or ROVs could be deployed to help locate the turtles. There is some  
373 chance that some turtles may be on the bottom waiting for the water to warm. Very  
374 few have been observed near the surface whenever searches have been conducted.

375 As the frequency of extreme weather events is apparently on the increase [41,42]  
376 the chances of turtles being suddenly surprised by wind and temperature changes will  
377 increase. As the population of animals continue to increase [3], as more individuals  
378 start their migration from the Gulf of Mexico beaches, and as more of these tropical  
379 species migrate north with warming conditions [43], will we see a larger sea turtle  
380 population in Cape Cod Bay in the future and will that result in larger strandings?

## 381 **Conclusion**

382 With some specified degree of uncertainty, the ocean current and temperatures  
383 simulated by the FVCOM ocean model is similar to that observed by satellite-tracked  
384 drifters and moored observations. The model can help predict the strandings of the  
385 Kemp's ridley turtle on the shores of Cape Cod and also be used to backtrack their  
386 source. In the forward prediction runs, the FVCOM model helped explain the  
387 anomalously large stranding event, for example, that occurred on Outer Cape Cod  
388 between November 18 – 23, 2014. In general, the geographic distribution of  
389 strandings is consistent with the model simulation of ocean current and wind. Given  
390 these findings, coastal ocean models such as FVCOM can help explain the general  
391 locations of strandings and may help volunteers to rescue turtles in the future.

392 In the backtracking experiments, the FVCOM model was used to estimate the  
393 origin of stranded Kemp's ridley turtles in 2012 and 2013, showing with a specified  
394 degree of uncertainty that most turtles stranded in November were originally located  
395 in a variety of locations in both Cape Cod Bay and Massachusetts Bay when they  
396 were first exposed to cold-stun temperatures ( $<10.5\text{ }^{\circ}\text{C}$ ). The turtles stranded in  
397 December may have originated well outside Cape Cod Bay just a few weeks earlier.

398 There are still many uncertainties as to when the turtles are cold-stunned but a  
399 simple regression of different components of the wind stress (with water temperatures  
400 below the  $10.5^{\circ}\text{C}$  threshold) vs number of strandings indicate that values greater than  
401  $0.4\text{ Pa}$  will induce more stranding events ( $r^2=95$ ). As expected, strong winds out of  
402 the west will result in Outer Cape strandings and strong winds out of the north will  
403 result in Mid-Cape strandings.

404 While progress has been made in simulating the stranding events, considerable  
405 more work needs to be conducted to a) determine the depth of the water column

406 occupied by the turtles and b) the differential effects of surface advection due to wind  
407 and waves relative to near-surface currents.

408

## 409 **Acknowledgements**

410 Thanks to all those who have helped with this analysis, the many turtle rescue  
411 volunteers, the staff at Mass Audubon's Wellfleet Bay Wildlife Sanctuary, Dr. Vitalli  
412 Sheremet for help in coding, anonymous reviewers at NEFSC, and Dr. Dai Honglei  
413 for long term encouragement and support. The Massachusetts Division of Marine  
414 Resources provided some of their moored temperature observations from Cape Cod  
415 Bay and the UMASS Dartmouth FVCOM modeling group provided on-line access to  
416 their simulations.

417

418

## 419 **References**

1. Plotkin, PT. National Marine Fisheries Service and U. S. Fish and Wildlife Service Status Reviews for Sea Turtles Listed under the Endangered Species Act of 1973. National Marine Fisheries Service, Silver Spring, Maryland, 2009. 109-116.
2. National Marine Fisheries Service, U.S. Fish and Wildlife Service, and Secretaría de Medio Ambiente y Recursos Naturales . Bi-national Recovery Plan for the Kemp's ridley Sea Turtle (*Lepidochelys kempii*). Second Revision. 2011. National Marine Fisheries Service, Silver Spring, Maryland, USA.
3. Bevan, E., T. Wibbels, B. M. Z. Najera, L. Sarti, F. I. Martinez, J. M. Cuevas, B. J. Gallaway, L. J. Pena, and P. M. Burchfield. 2016. Estimating the historic size and current status of the Kemp's ridley sea turtle (*Lepidochelys kempii*) population. *Ecosphere* 7(3):e01244. 10.1002/ecs2.124
4. U.S. Fish and Wildlife Service. List of endangered foreign fish and wildlife. *Federal Register* 1970;35:18319–18322.
- 5 .McClellan, CM, Read AJ, Cluse WM, and Godfrey MH. Using telemetry to mitigate the bycatch of long-lived marine vertebrates. *Ecological Applications* 2009;19(6):1660-1671.
6. Putman, NF and Mansfield KL. 2015. Direct evidence of swimming demonstrates active dispersal in the sea turtle “lost years.” *Current Biology* 25:1-7.
- 7 . Shaver, DJ, Hart KM, Fujisaki I, Rubio C, Sartain AR, Pena J, et al Foraging area fidelity for Kemp's ridleys in the Gulf of Mexico. *Ecology and Evolution* 2013;3(7):2002-2012

8. Shaver, DJ, Schroeder BA, Byles RA, Burchfield PM, Peña J, Márquez R, et al. Movements and home ranges of adult male Kemp's ridley sea turtles (*Lepidochelys kempii*) in the Gulf of Mexico investigated by satellite telemetry. *Chelonian Conserv. Biol.* 2005;4:817–827.
9. Shaver, DJ, Rubio C. Post-nesting movement of wild and head-started Kemp's ridley sea turtles (*Lepidochelys kempii*) in the Gulf of Mexico. *Endanger. Species Res.* 2008;4:43–55.
10. Kemp's ridley Sea Turtle. *Lepidochelys kempii*. URL: <http://www.docin.com/p-984318341.html>
11. Coleman AT, Pitchford JL, Bailey H, and Solangi M. 2017. Seasonal movements of immature Kemp's ridley sea turtles (*Lepidochelys kempii*) in the northern gulf of Mexico. *Aquatic Conserv: Mar. Freshw. Ecosyst.*,2017; 27: 253–267. doi: 10.1002/aqc.2656.
12. Schmid JR and Witzell WN. Seasonal Migration of Immature Kemp's Ridley Turtles (*Lepidochelys kempii* Garman) Along the West Coast of Florida. *Gulf of Mexico Science* 2006; 24 (1). Retrieved from <https://aquila.usm.edu/goms/vol24/iss1/5>
13. Bleakney, JS. Four records of the Atlantic ridley turtle, *Lepidochelys kempii*, from Nova Scotia. *Copeia* 1955;2:137.
14. Burke VJ, Morreale SJ, Standora EA (1994). "Diet of the Kemp's ridley sea turtle, *Lepidochelys kempii*, in New York waters". NOAA NMFS Fishery Bulletin. Retrieved Dec 20, 2015
15. Hart KM, Mooreside P, and Crowder LB Interpreting the spatio-temporal patterns of sea turtle strandings: Going with the flow. *Biol Conserv.* 2006;129: 283–290

- 16 .Santos BS,Kaplan DM, Friedrichs AM, Barco SG, Mansfield KL, and Manning JP.Consequences of drift and carcass decomposition for estimating sea turtle mortality hotspots. 2017;Ecological Indicators,84:391-396.
- 17 .Epperly PS, Braun J, Chester A, Cross F, Merriner J, Tester P, Churchill J.. Beach Strandings as an Indicator of At-Sea Mortality of Sea Turtles. 1996. Bulletin of Marine Science. 59. 289-297.
- 18 .Koch V, Peckham H, Mancini A, and Eguchi T. Estimating At-Sea Mortality of Marine Turtles from Stranding Frequencies and Drifter Experiments, 2013; PLoS ONE 8(2): e56776. doi:10.1371/journal.pone.0056776
- 19 .Keinath, JA, Musick JA, Byles RA. 1987. Aspects of the biology of Virginia's sea turtles: 1979-1986. Virginia J. Sci. 38(4):329-336.
- 20 .Byles, RA 1988. Behavior and ecology of sea turtles from Chesapeake Bay, Virginia. Ph.D. dissertation, College of William and Mary, Virginia Institute of Marine Science, Gloucester, VA.
- 21 .Blair EW, Ehrhart LM. Hypothermic Stunning and Mortality of Marine Turtles in the Indian River Lagoon System, Florida. American Society of Ichthyologists and Herpetologists. 1989;3:696-703.
- 22 .Schwartz FJ. Behavioral and tolerance responses to cold water temperatures by three species of seaturtles (Reptilia,Chelonidae) in North Carolina. Fla Mar Res Publ.1978;33:16-18 .
- 23 .Morreale SJ, Meylan AB, Sadove SS, Standora EA, et al. Annual Occurrence and Winter Mortality of Marine Turtles in New York Waters. Journal of Herpetology, 1992;26(3):301–308. JSTOR, [www.jstor.org/stable/1564885](http://www.jstor.org/stable/1564885).

- 24 .Burke VJ, Standora EA, Morreale SJ. Factors Affecting Strandings of Cold-Stunned Juvenile Kemp's ridley and Loggerhead Sea Turtles in Long Island, New York. *Copeia*, 1991;4:1136–1138. [www.jstor.org/stable/1446115.9](http://www.jstor.org/stable/1446115.9).
25. Still BM, Griffin CR, Prescott R. Climatic and oceanographic factors affecting daily patterns of juvenile sea turtle cold-stunning in Cape Cod Bay, Massachusetts. *Chelonian Conserv Biol.* 2005; 4: 883–89 0
- 26 .Gorman J. A Surge of Stranded Turtles. *The New York Times*. URL: <https://www.nytimes.com/2014/12/13/science/a-cape-cod-mystery-hundreds-of-sea-turtles-stranded-on-beaches.html>. 2014.
- 27 .Nero RW, Cook M, Coleman AT, Solangi M, Hardy R Using an ocean model to predict likely drift tracks of sea turtle carcasses in the north central Gulf of Mexico. *Endang Species Res* 2013; 21:191-203. <https://doi.org/10.3354/esr00516>
- 28 .Chen C, Liu H., Beardsley RC. An unstructured, finite-volume, three-dimensional, primitive equation ocean model: application to coastal ocean and estuaries. *J. Atm.&Oceanic Tech.*, 2003a;20: 159-186.
- 29 .Chen C, Beardsley RC, Cowles G, Qi J, Lai Z, Gao G, et al. An Unstructured Grid, Finite-Volume Coastal Ocean Model FVCOM User Manual. 2011. SMASST/UMASSD-11-1101.
- 30 .Poulain P. Drifter observations of surface circulation in the Adriatic Sea between December 1994 and March 1996. *Journal of Marine Systems*, 1999;20: 231-253.
- 31 .Davis, RE, Drifter observations of coastal surface currents during CODE: The method and descriptive view, *J. Geophys. Res.*, 1985; 90(C3), 4741–4755, doi: 10.1029/JC090iC03p04741.

32 .Manning JP, McGillicuddy DJ, Pettigrew N, Churchill JH, Incze L. Drifter Observations of Maine Coastal Current Drift. *Continental Shelf Res.* 2009;doi:10.1016/j.csr.2008.12.008.

33 .Lynch DR, Greenberg DA, Bilgili A , McGillicuddy DJ, Manning JP, Aretxabaleta AL . Particles in the Coastal Ocean Theory and Applications. Cambridge University Press, America. 2015, pp. 20-21

34 .The GoMOOS Moored Buoy Design. URL:  
<http://gyre.umeoce.maine.edu/GoMoos/oceans2003.pdf>.

35 .Manning JP, Pelletier E. Environmental Monitors on Lobster Traps: longterm temperature observations from New England's bottom waters. *Jour. of Operational Oceanography.* 2009;2:25-33.

36 .Breivik, O, TC Bekkvik, C Wettre and A Ommundsen (2012). BAKTRAK: backtracking drifting objects using an iterative algorithm with a forward trajectory model, *Ocean Dyn* 62:2, pp 239-252

37 .Breivik Ø, Allen AA, Maisondieu C and Roth JC. Wind-induced drift of objects at sea: the leeway field method. 2011 doi:10.1016/j.apor.2011.01.005

38 .Carniel S, Warner JC, Chiggiato J, and Sclavo M. Investigating the impact of surface wave breaking on modeling the trajectories of drifters in the Northern Adriatic Sea during a wind-storm event. *Ocean Modelling.* 2009;30:225-239.

39 .Röhrs J, Christensen KH, Hole LR, et al. Observation-based evaluation of surface wave effects on currents and trajectory forecasts. *Ocean Dynamics* 2012;62: 1519-1533.

40. Beron-Vera FJ, Olascoaga MJ, and Lumpkin R. Inertia-induced accumulation of flotsam in subtropical gyres. *Geophys. Res. Lett.* 2016;43:12228-12233.



41 .Vose, RS. and Coauthors. Monitoring and understanding changes in extremes: Extratropical storms, winds, and waves. *Bull. Amer. Meteor. Soc.* 2014;95:377–386. doi:<https://doi.org/10.1175/BAMS-D-12-00162.1>.

42. Saunders MA, Lea AS. 2008. Large contribution of sea surface warming to recent increase in Atlantic hurricane activity. *Nature.* 451(7178):557.

43. Griffin LP, Griffin CR, Finn JT, Prescott RL, Faherty M, Still BM, Danylchuk AJ, Warming seas increase cold-stunning events for Kemp’s ridley sea turtles in the northwest Atlantic. *Plos One* 14(1): e0211503.

# CODE SURFACE DRIFTER

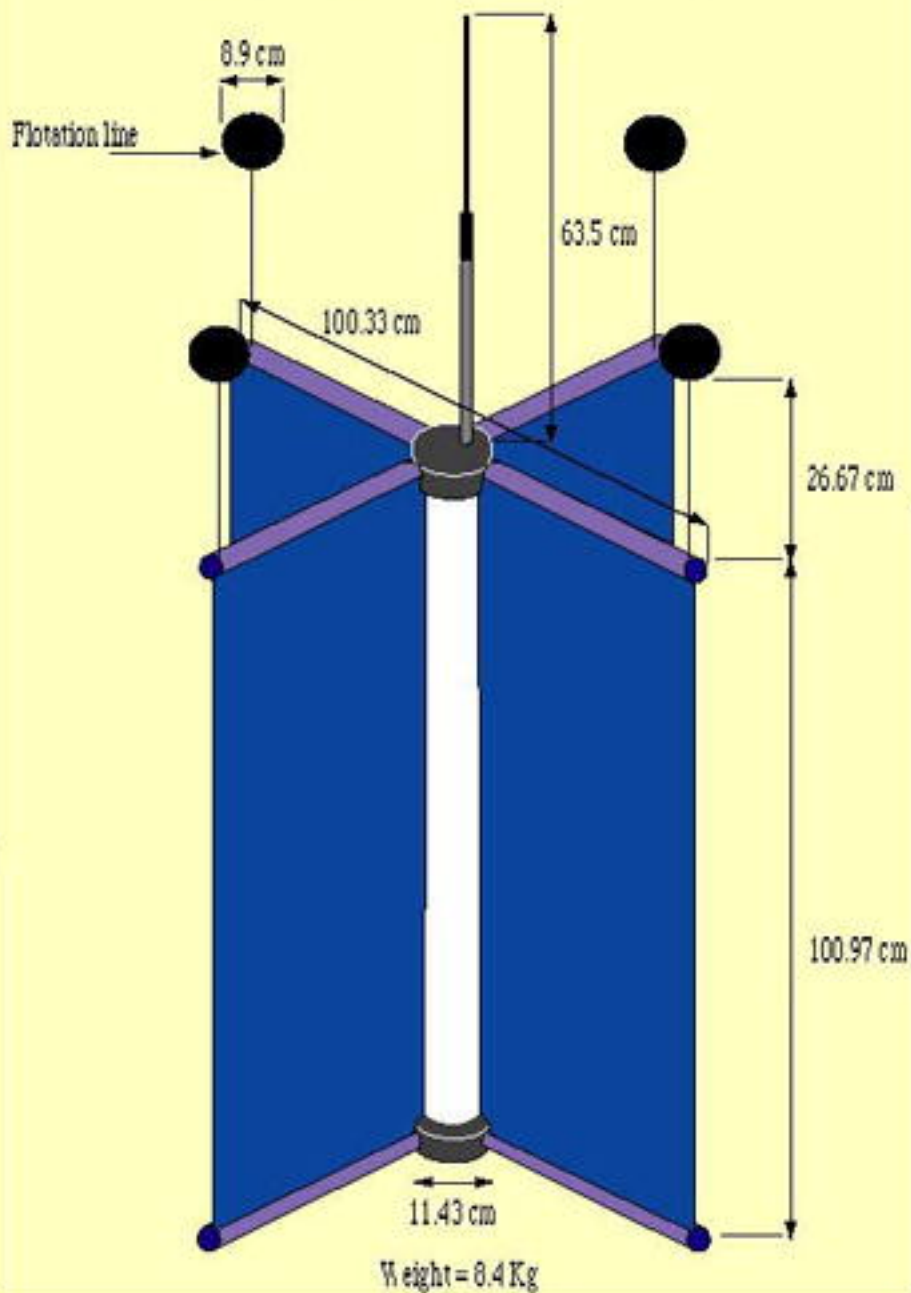

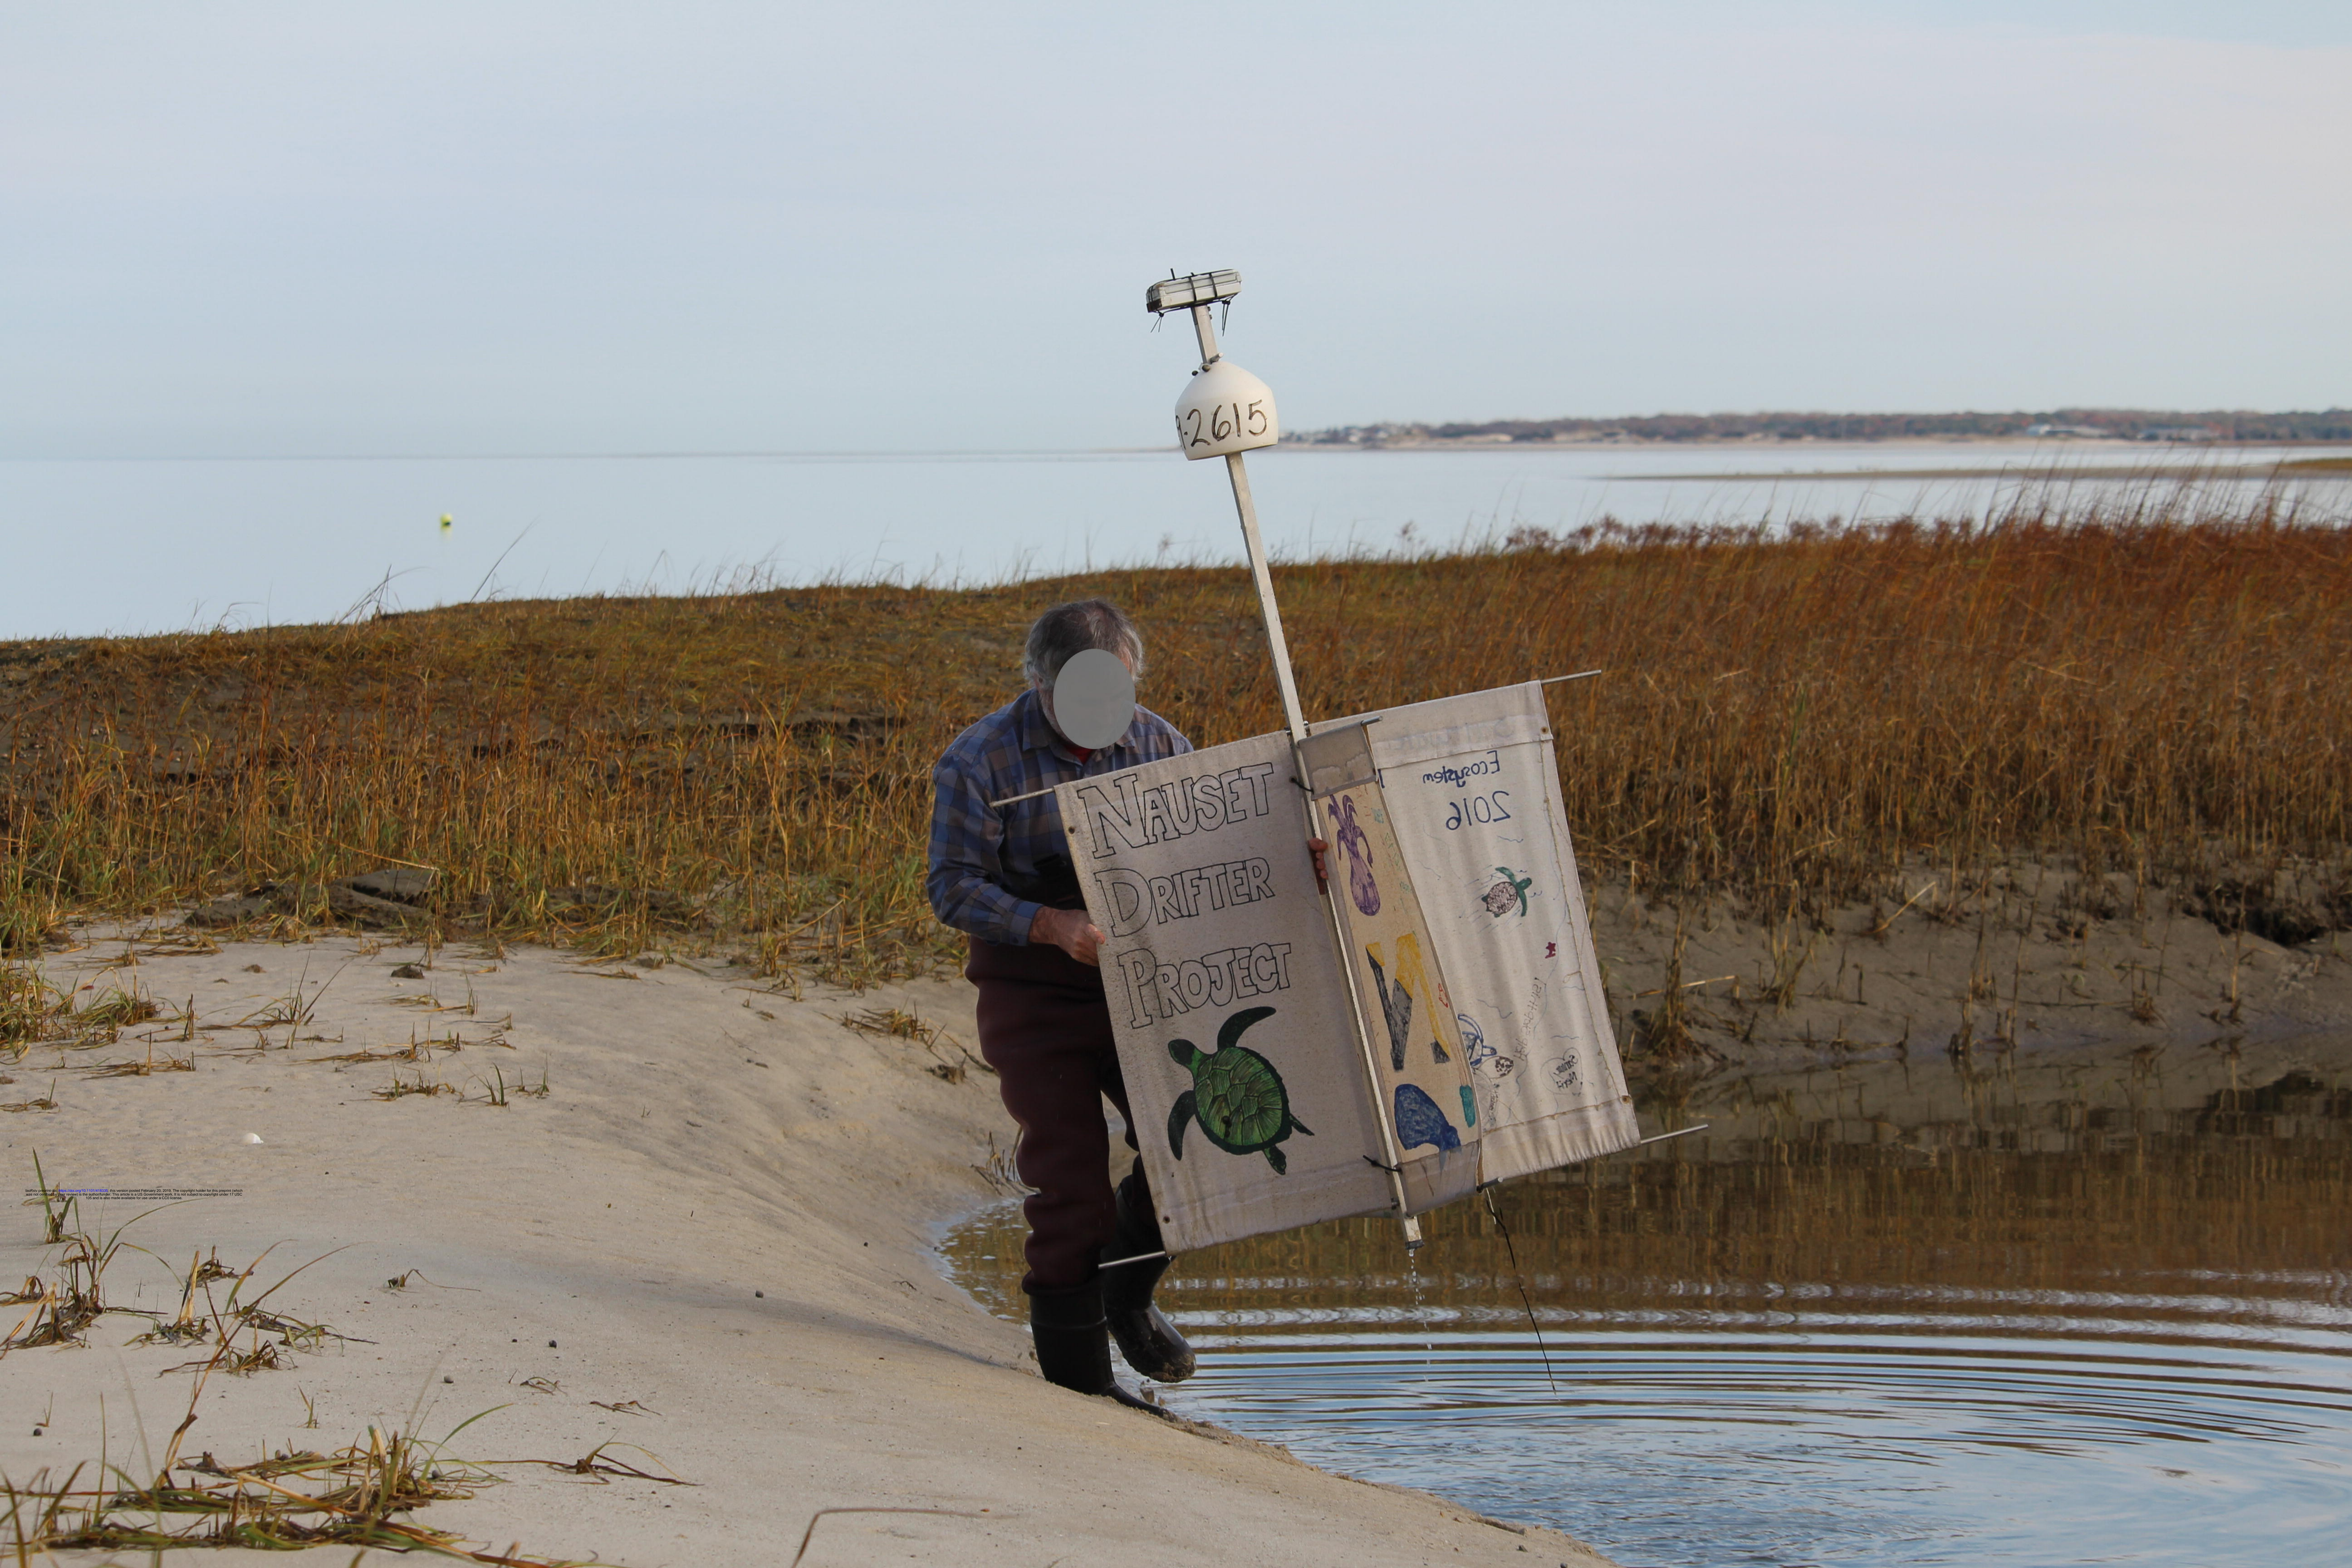

2615

NAUSET  
DRIFTER  
PROJECT

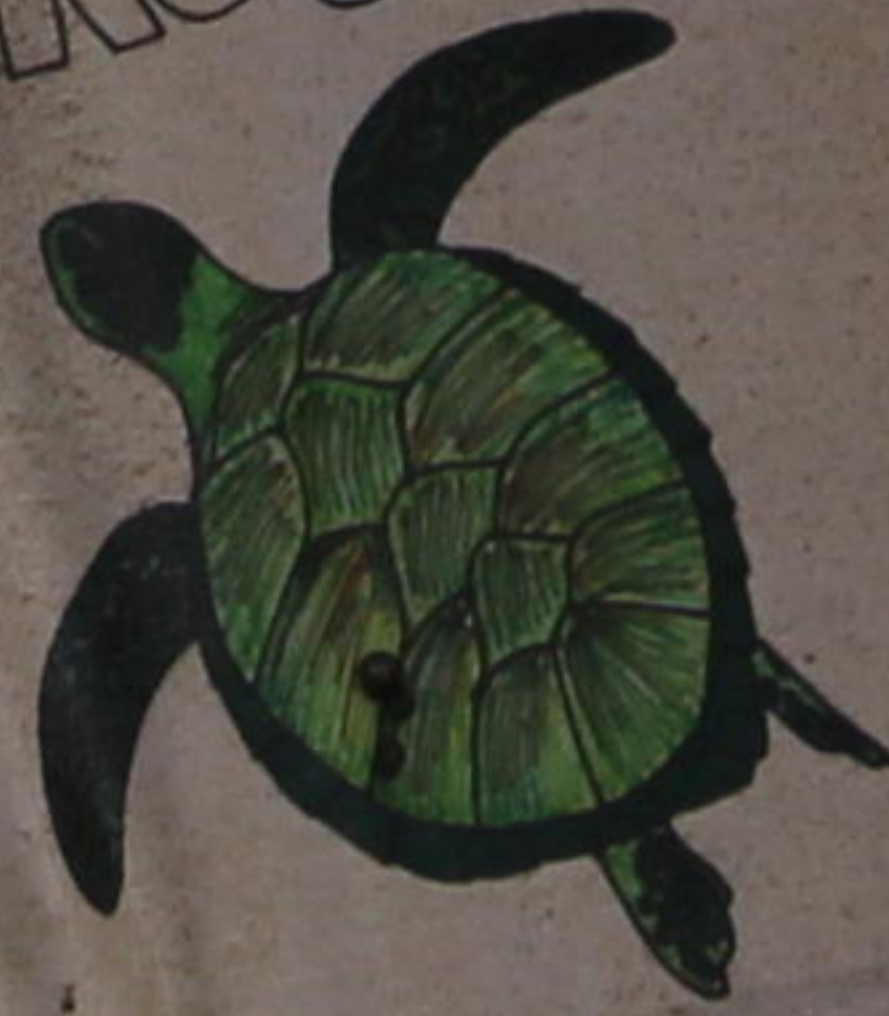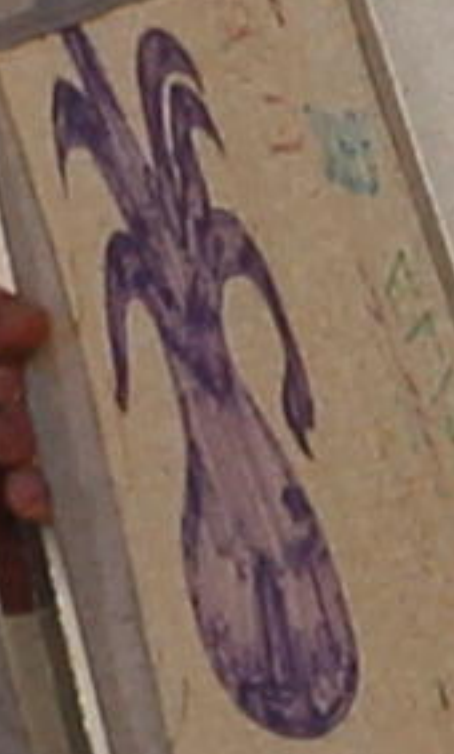

Ecosystem  
2016

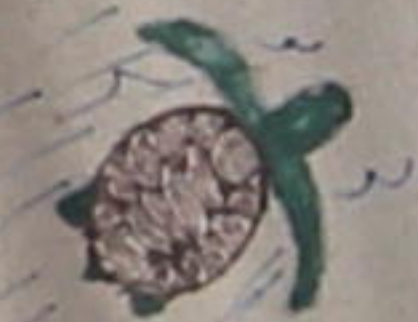

LET'S PROTECT!

Protect  
Fish

The number of turtles per year

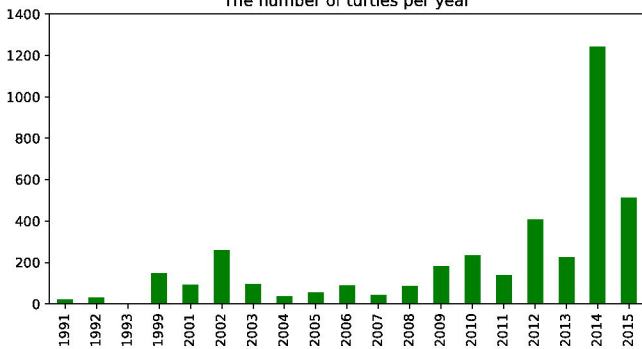

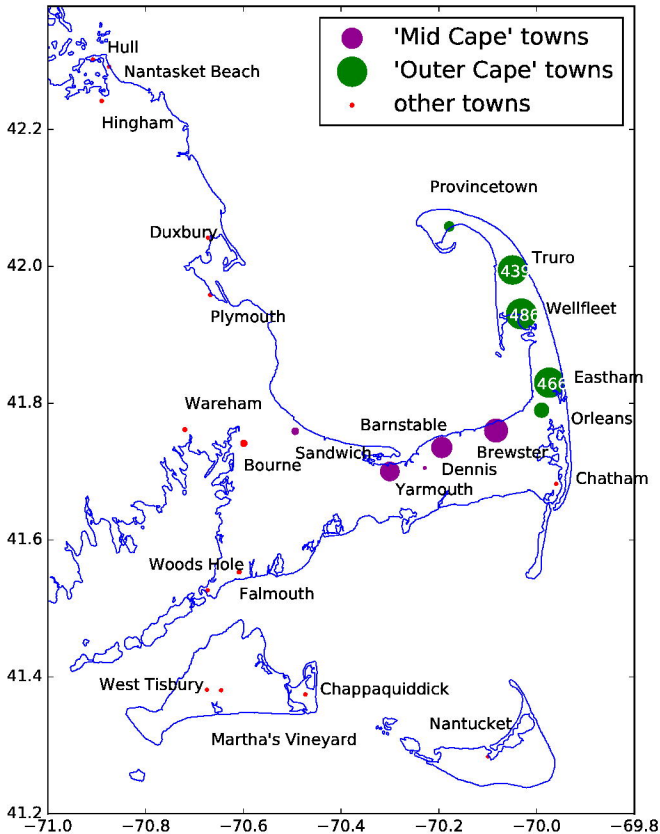

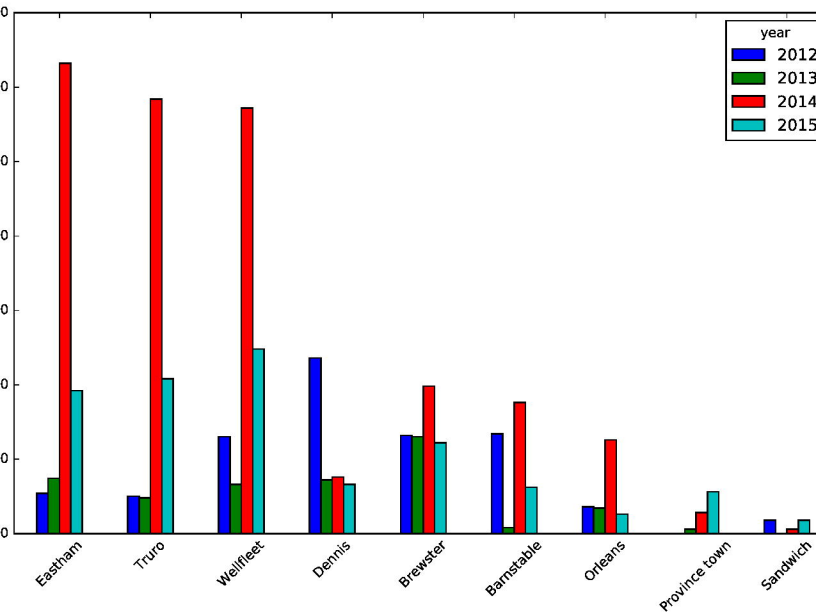

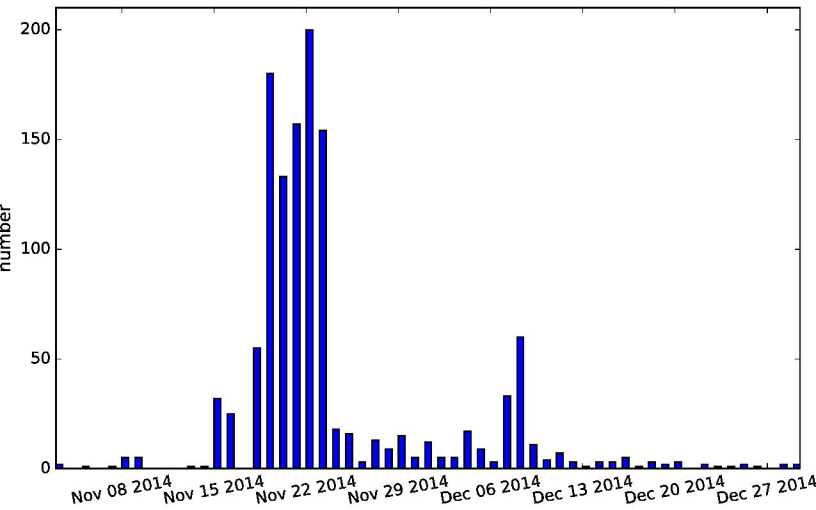

a

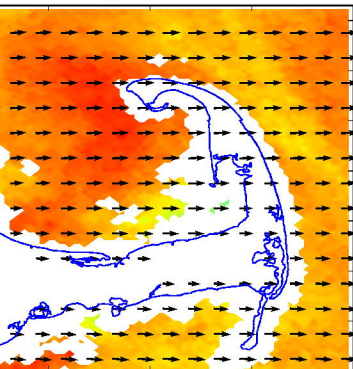

b

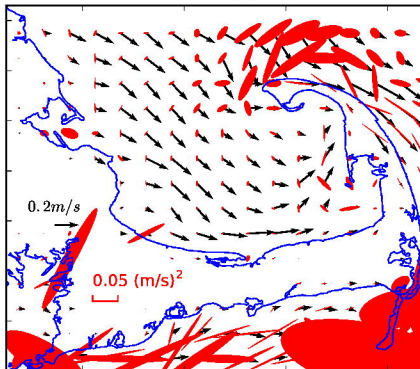

c

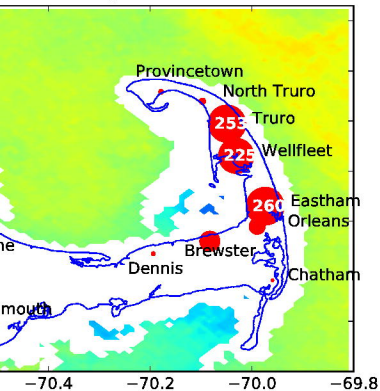

d

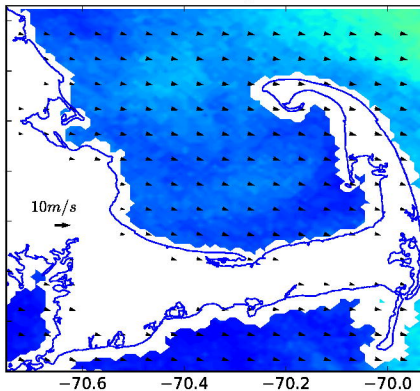



## 2012 wind stickplot

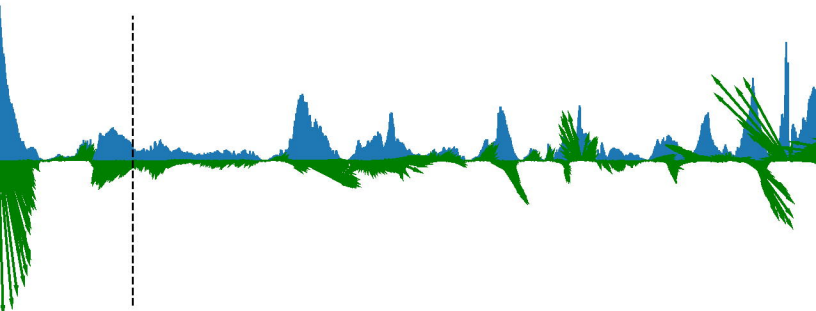

a

## 2012 temperature vs strandings

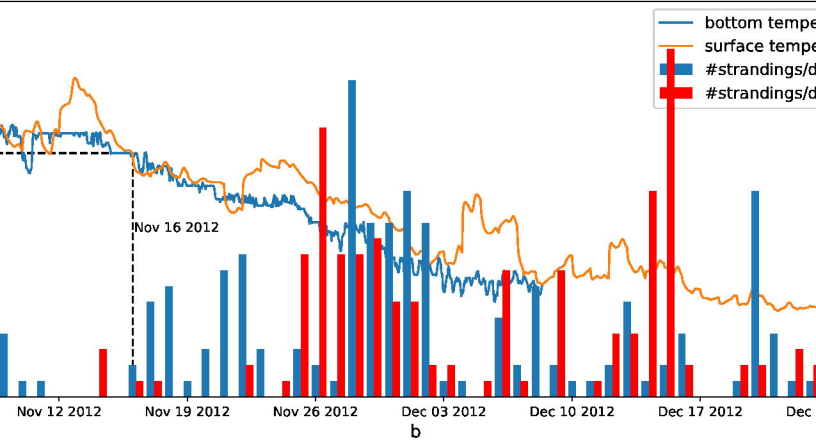

2013 wind stickplot

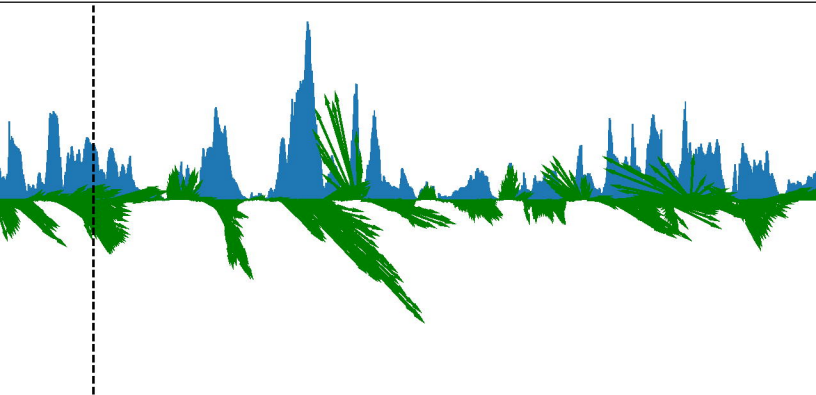

a

2013 temperature vs strandings

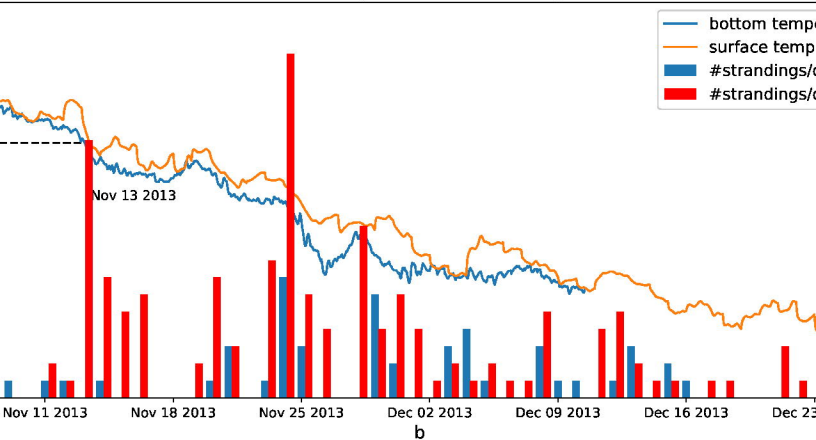

b

## 2014 wind stickplot

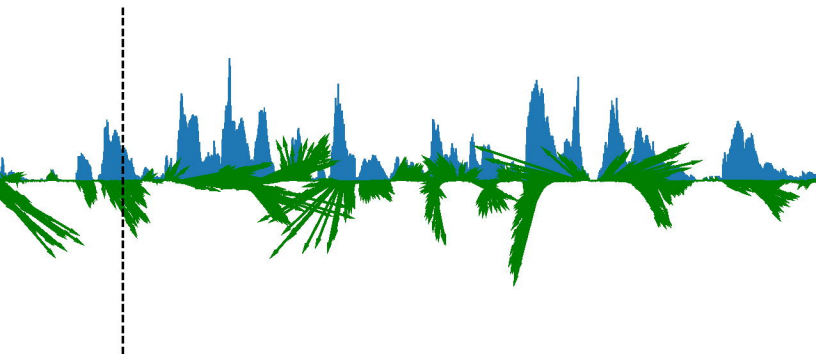

a

## 2014 temperature vs strandings

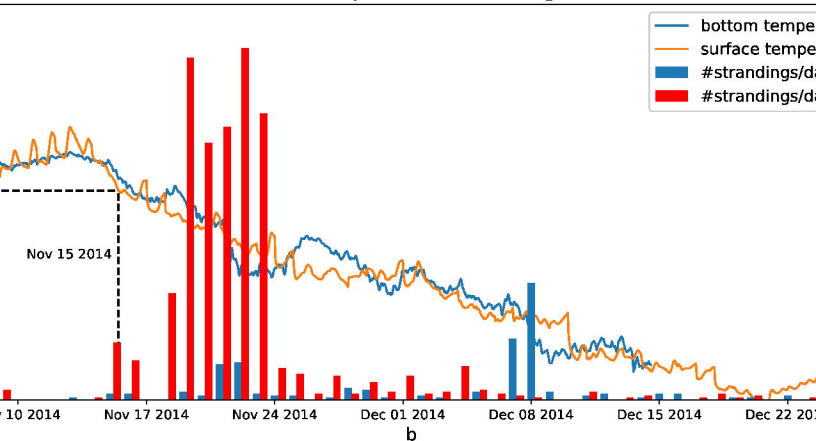

Wind stress vs strandings on Outer Cape towns

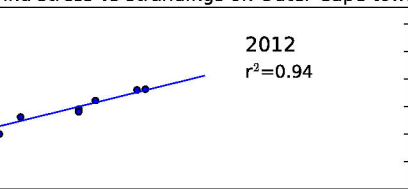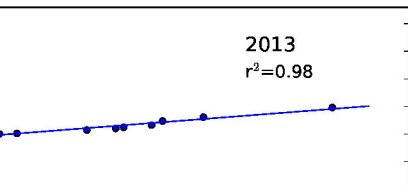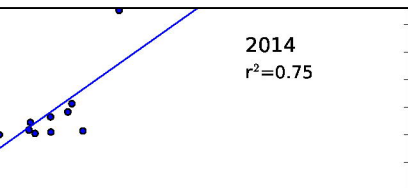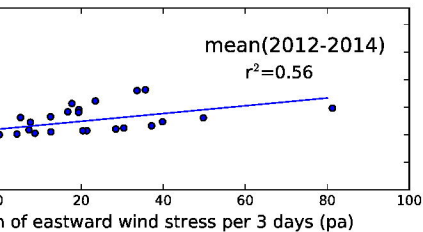

sum of eastward wind stress per 3 days (pa)

Northward wind stress vs strandings on

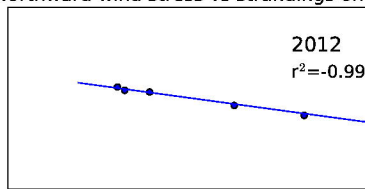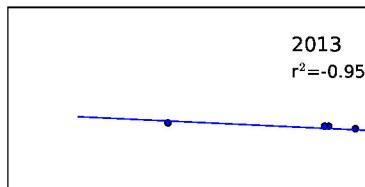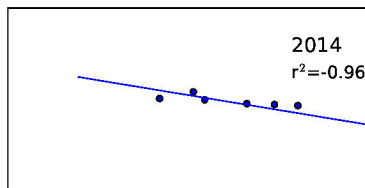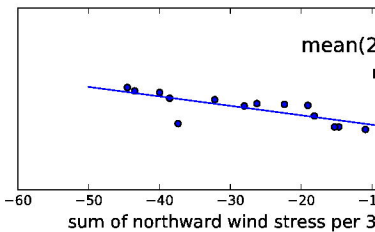

sum of northward wind stress per 3 days (pa)

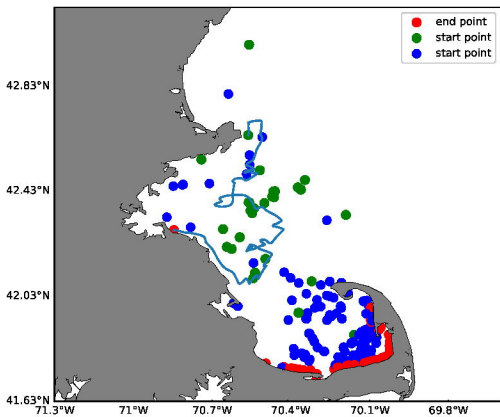

the temperature along the trajectory

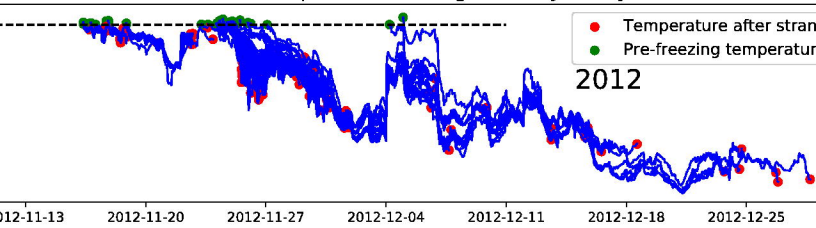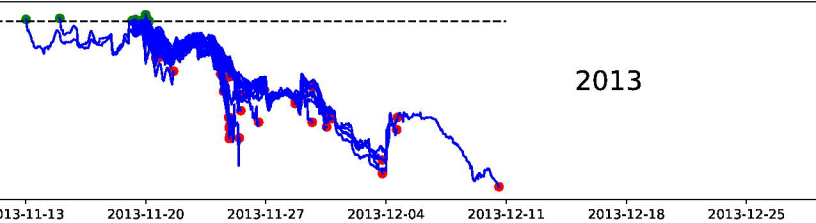

GOM3

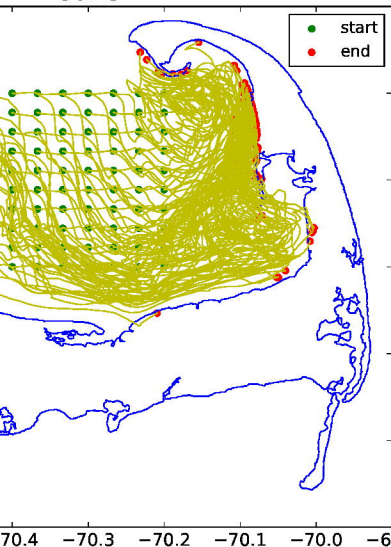

MassBay

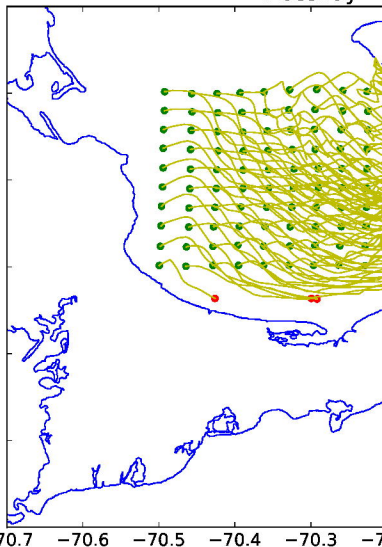

Source: https://www.biorxiv.org/content/10.1101/418335v3.full.pdf
